# Supplementary material for: Comparison of Derivatization Methods for Groomed Latent Print Residues Analysis via Gas Chromatography
Source: MDPI journal article supplement (doi:10.3390/forensicsci3020023), 2023-05-17
Supplement: s1 [file s1]

Article

# Comparison of Derivatization Methods for Groomed Latent Print Residues Analysis via Gas Chromatography

Jessica Kindell <sup>1</sup> and Candice Bridge <sup>1,2,\*</sup>

<sup>1</sup> Department of Chemistry, University of Central Florida, Orlando, FL 32816, USA

<sup>2</sup> National Center for Forensic Science, University of Central Florida, Orlando, FL 32816, USA

\* Correspondence: cbridge@ucf.edu; Tel.: +1-407-823-1263

## Supplemental Materials

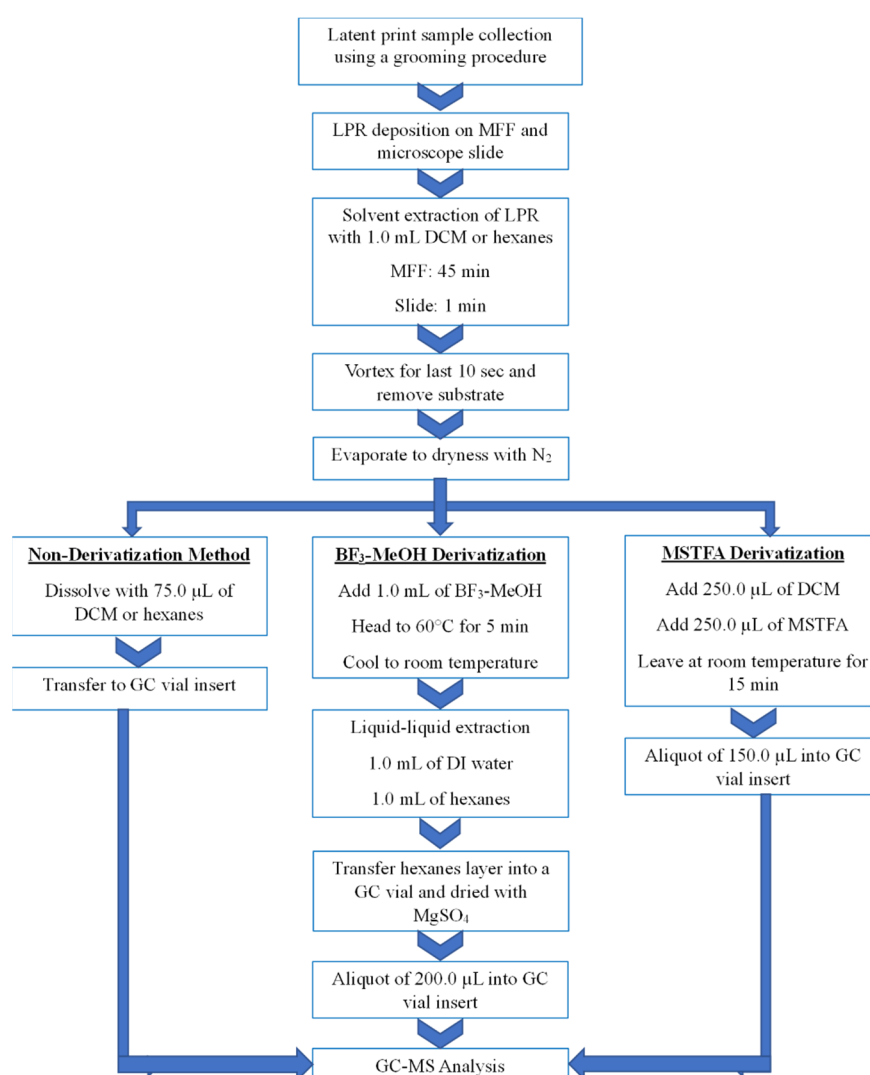

**Figure S1.** Flowchart of the sample preparation and derivatization methods for this manuscript.

## Latent Print Chemistry

Latent prints are one of the three major fingerprint evidence left at crime scenes and are comprised of sweat oils, dirt, and other exogenous materials collected on the fingers and transferred to a surface creating a translucent print. LP chemistry is composed of a combination of organic and inorganic components and elements secreted from the body

through glands found in the dermis layer of the skin in addition to the transference of external sources of contamination. The skin has three types of glands: the eccrine, sebaceous, and apocrine glands [1–4]. The eccrine sweat glands are distributed all over the body but are mainly concentrated on the volar surfaces [5,6]. The sweat produced is composed of 99% water with trace amounts of organic and inorganic components such as amino acids, vitamins, urea, chloride, sodium, salts, phosphates, and ammonia [1–3,7]. The amino acids in sweat have been a research focus for characterizing latent prints with the use of various instrumental analytical techniques such as GC-MS, LC-MS, and UV-spectrophotometry. Amino acids found in sweat are serine, glycine, alanine, ornithine, ornithine-lysine, aspartic acid, threonine, histidine, valine, leucine, glutamic acid, isoleucine, phenylalanine, lysine, and tyrosine [2,7,8].

Secretions from the sebaceous glands, which are located throughout the body, and are associated with hair follicles, but are heavily concentrated on the head with the primary function of lubricating and moisturizing the skin and hair [2]. Sebum is generally composed of fatty acids and triglycerides (57.5%), wax esters (26.0%), squalene (12.0%), cholesterol (1.5%), and sterols (3.0%) [2,9,10]. The fatty acids and any mono- and diglycerides present in sebum are a result of the hydrolysis of triglycerides by bacterial lipases when exposed to the skin surface [2,11]. Since the sebaceous glands are not located on the volar surfaces, the oils can only be transferred to these regions typically by touching the face or hair. Traces of metabolites from drugs, medications, and diet-specific foods could be part of the composition of the eccrine and sebaceous gland secretions.

Lastly, the bodily secretion from the apocrine glands, which is located around the thicker and courser hair found in the genital and armpit regions [1,2]. The gland is larger than the eccrine gland and is located above the sebaceous gland duct [2]. Apocrine glands secrete thicker fluid that is often mixed with sebum, but components isolated from these secretions are proteins, carbohydrates, cholesterol, iron, sulfates, and steroids [2]. Table S1 lists some of the components identified in literature that uses non-derivatized samples.

**Table S1.** Components identified in literature of latent print residues analyzed using a non-derivatization method.

| Component name                  | MW (g/mol) | Type      | Reference        | Component name                       | MW (g/mol) | Type         | Reference        |
|---------------------------------|------------|-----------|------------------|--------------------------------------|------------|--------------|------------------|
| Nonanoic acid                   | 158.23     | FA        | [12,13]          | Cholesterol acetate and isomers      | 428.6962   | Sterol ester | [14]             |
| Diglycerides                    | 176.12     | Glyceride | [12,13,15]       | Myristyl hexadecenoate               | 450.8      | WE           | [16]             |
| Dodecanoic acid                 | 200.3178   | FA        | [12,13,15,17,18] | 9-hexadecenoic acid tetradecyl ester | 452.7962   | WE           | [13,14,17]       |
| Tridecanoic acid                | 214.348    | FA        | [12,13,16–18]    | Myristyl palmitate                   | 452.8      | WE           | [13,16]          |
| Tetradecenoic acid              | 226.360    | FA        | [13,16,18,19]    | Palmityl myristate                   | 452.8      | WE           | [13,16]          |
| Hpetadecanoic acid              | 270.45     | FA        | [12,13,16,19]    | 9-hexadecenoic acid hexadecyl ester  | 476.8      | WE           | [17]             |
| Eisocanoic acid methyl ester    | 312.5304   | FAME      | [12,13,16,19]    | Palmityl palmitoleate                | 478.8      | WE           | [13,18]          |
| Docosanoic acid methyl ester    | 354.6101   | FAME      | [13]             | Palmityl palmitate                   | 480.86     | WE           | [13,18]          |
| Tricosanoic acid methyl ester   | 368.6      | FAME      | [13]             | 9-hexadecenoic acid octadecyl ester  | 506.9      | WE           | [17]             |
| Tetracosanoic acid methyl ester | 382.7      | FAME      | [13]             | 9-hexadecenoic acid octadecyl ester  | 508.9      | WE           | [17]             |
| Cholesterol                     | 386.6535   | Sterol    | [13,14,17,18,20] | 9-hexadecenoic acid eicosyl ester    | 534.9398   | WE           | [17]             |
| Myristyl myristate              | 424.7      | WE        | [13,16–18]       | Cholesterol esters                   | 637.1      | Sterol ester | [13,14,17,18,20] |
| Lauryl palmitate                | 424.7      | WE        | [13,16,18]       | Mixed di- and monoglycerides         | ---        | Glycerides   | [15]             |

|                   |         |    |      |                                  |     |            |      |
|-------------------|---------|----|------|----------------------------------|-----|------------|------|
| Stearyl decanoate | 424.743 | WE | [16] | Monoglycerides and phospholipids | --- | Glycerides | [15] |
|-------------------|---------|----|------|----------------------------------|-----|------------|------|

Since most of the components found in these secretions are amino acids and lipids, they typically contain either carboxyl, amino, or hydroxy functional groups which induce dipole-dipole moments and can form hydrogen bonds, making them polar or extremely polar. If analyzing samples using a more nonpolar GC column, which is the common general-use column, the amino acids and lipids would need to be derivatized. As previously mentioned, derivatization would make polar components more compatible to a nonpolar stationary phase by removing the active hydrogen on polar functional groups and replacing them with a more nonpolar functional group; thereby decreasing the overall polarity of the target component. The three commonly used general derivation reaction types are alkylation, acylation, and silylation [21–23]; however, only alkylation with  $\text{BF}_3\text{-MeOH}$  and silylation with MSTFA are discussed herein.

#### *$\text{BF}_3$ Derivatization*

Polar components in latent prints, e.g., fatty acids and amino acids, underwent a Fischer esterification with  $\text{BF}_3\text{-MeOH}$ . This type of derivatization requires a carboxyl group, found in both lipids and amino acids, an alcohol (i.e., methanol), and a Lewis acid catalyst (Figure S2) [24]. The oxygen on the carbonyl is protonated by the catalyst, i.e., boron trifluoride ( $\text{BF}_3$ ), creating an electrophile. Then the nucleophilic methanol attacks the electrophilic carbon. Deprotonation of the methanol by the hydroxyl group of the intermediate removes the positive charge on the oxygen of the nucleophile resulting in a loss of water. Then the  $\text{BF}_3$  leaves resulting in a methyl ester. The reverse is true due to  $\text{BF}_3\text{-MeOH}$ 's ability to transesterify esters into methyl esters. Any wax esters present are susceptible to be transformed into methyl esters and alcohols which would contribute to the overall abundance of the fatty acids already present within the residue.

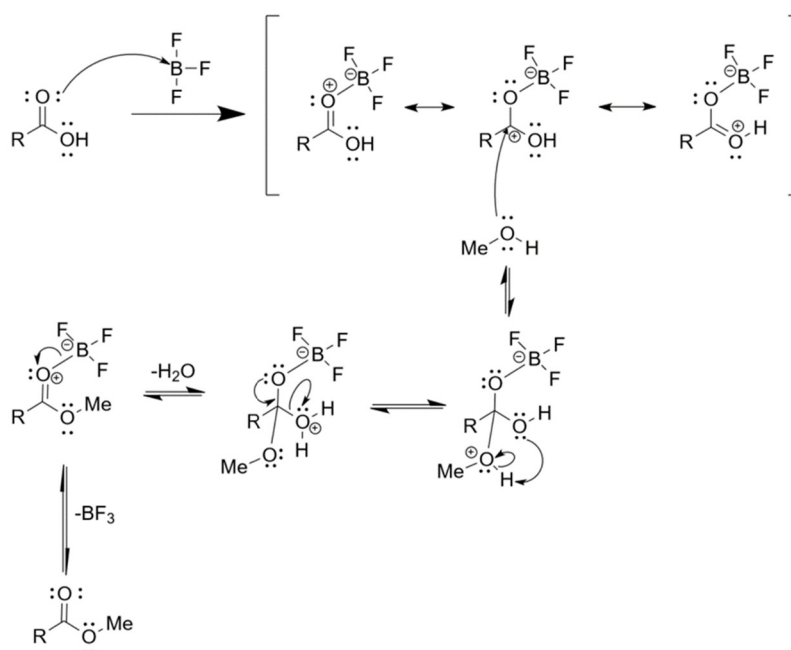

**Figure S2.** Proposed Fischer esterification of a carboxylic acid, i.e., free fatty acids in the LPR, with a Lewis ester, boron trifluoride ( $\text{BF}_3$ ), in the presence of an alcohol, methanol ( $\text{MeOH}$ ).

When fatty acids are esterified, the resulting methyl esters will elute faster than the fatty acids (Figure S3). Even though the methyl esters are heavier than the fatty acids by a mass of 14 a.u., they have lower boiling points because of the weak London dispersion and dipole-dipole forces, causing vaporization to occur at lower temperatures [24].

Meanwhile, non-derivatized fatty acids exhibit stronger intramolecular forces, primarily due to hydrogen bonding from both oxygens on the hydroxyl and carbonyl groups. This would result in more energy needed, i.e., higher temperatures, to break those bonds, thus eluting after methyl esters.

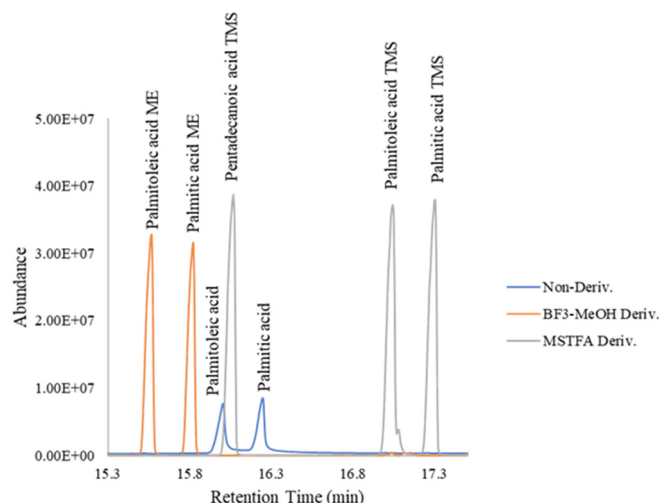

**Figure S3.** Example chromatogram of the chemical shifts between non-derivatized fatty acids, BF<sub>3</sub>-MeOH derivatives, and MSTFA derivatives.

**Table S2.** Component identification list for the less abundant peaks observed in the BF<sub>3</sub>-MeOH/slide (left) and BF<sub>3</sub>-MeOH/MFF (right) TICs for the forehead LPRs of volunteer 4. \* identifies components observed in derivatized and non-derivatized samples.

| BF <sub>3</sub> -MeOH/Slide                 |                      | BF <sub>3</sub> -MeOH/Slide              |                      |
|---------------------------------------------|----------------------|------------------------------------------|----------------------|
| Component Identification                    | Retention Time (min) | Component Identification                 | Retention Time (min) |
| Decane                                      | 5.40                 | Decane                                   | 5.73                 |
| Undecane                                    | 6.52                 | Undecane                                 | 6.87                 |
| Dodecanoic acid, methyl ester*              | 10.49                | 2,4-di-tert-butylphenol                  | 10.73                |
| Methyl tetradecanoate                       | 11.87                | Dodecanoic acid methyl ester*            | 10.86                |
| Methyl 13-methyltetradecanoate              | 12.45                | Dodecanoic acid, 4-methyl, methyl ester  | 11.27                |
| Tetradecanoic acid, 12-methyl, methyl ester | 12.57                | Methyl 11-methyl dodecanoate             | 11.37                |
| 9-octadecenoic acid (Z)-, methyl ester      | 12.63                | Dodecanoic acid, 10-methyl, methyl ester | 11.43                |
| Methyl 9-heptadecenoate (E or Z)            | 14.71                | Tridecanoic acid, methyl ester*          | 11.66                |
| cis-10-heptadecenoic acid, methyl ester     | 14.99                | Methyl tetradecanoate                    | 12.16                |
| Hexadecanoic acid, 14-methyl, methyl ester  | 14.99                | 7-hexadecenoic acid, methyl ester        | 12.29                |
| Heptadecanoic acid, methyl ester*           | 19.90                | (Z)-Methyl Z-11-tetradecanoate           | 13.02                |
| Octanoic acid, hexadecyl ester              | 26.5                 | Pentadecanoic acid, methyl ester         | 13.11                |
| Tris(tert-butyl)dimethylsiloxy)arsane       |                      | Methyl-13-methyltetradecanoate           | 15.53                |
|                                             |                      | Myristic acid, 12-methyl, methyl ester   | 15.83                |
|                                             |                      | cis-10-heptadecenoic acid, methyl ester  |                      |
|                                             |                      | Heptadecanoic acid, methyl ester*        |                      |

#### MSTFA Derivatization

Silylation undergoes nucleophilic substitution to replace the hydroxyl group or an active hydrogen of an amino or fatty acid to create a trimethylsilyl (TMS) derivative (Figure S4). The oxygen on the hydroxyl group acts as a nucleophile to attack the silicon on the TMS group of MSTFA. An intermediate forms while simultaneously protonating the nitrogen on the MSTFA from the hydroxyl group of the acid creating a leaving group. Out of the two nucleophilic substitution reactions, S<sub>N</sub>2 is more favored due to the use of polar aprotic solvents since silylation reagents and TMS derivatives are moisture

sensitive and can react with polar protic solvents instead. Chromatographically, the TMS derivative elutes after the fatty acid because it has more mass and is more non-polar than their respective fatty acids (Figure S3). Squalene, wax esters, and possibly triglycerides would be unaffected by the derivatization reagents due to the lack of an active hydrogen on their structure.

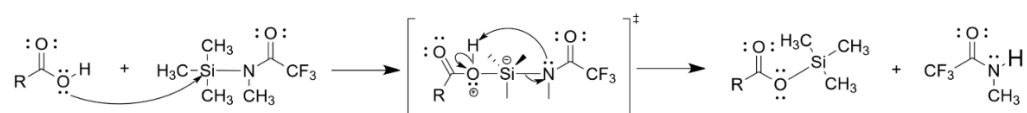

**Figure S4.** Proposed nucleophilic substitution reaction of a carboxylic acid with MSTFA producing a trimethylsilyl derivative.

**Table S3.** Component identification list for the less abundant peaks observed in the MSTFA/Slide (left) and MSTFA/MFF (right) TICs for the forehead LPRs of volunteer 4. \* identifies components observed in derivatized and non-derivatized samples.

| MSTFA/Slide                                |                      | MSTFA/MFF                                           |                            |
|--------------------------------------------|----------------------|-----------------------------------------------------|----------------------------|
| Component Identification                   | Retention Time (min) | Component Identification                            | Retention Time (min)       |
| Ethanamine, 2TMS derivative                | 4.74                 | Ethanamine, 2TMS derivative                         | 4.74                       |
| Methyltris(trimethylsiloxy)silane          | 5.74                 | Methyltris(trimethylsiloxy)silane                   | 5.69                       |
| Silanol, trimethyl-phosphate (3:1)         | 8.21                 | Silanol, trimethyl-, phosphate (3:1)                | 8.13                       |
| Dodecanoic acid, TMS derivative*           | 11.42                | Dodecanoic acid, TMS derivative                     | 11.34                      |
| 9-tetradecenoic acid, (E)-, TMS derivative | 12.75                | Tridecanoic acid, TMS derivative                    | 11.64, 11.85, 12.05        |
| Pentadecanoic acid, TMS derivative         | 13.53, 13.62         | 9-tetradecenoic acid, (E)-, TMS derivative          | 12.66                      |
| Heptadecanoic acid, TMS derivative*        | 15.55, 16.26         | Pentadecanoic acid, TMS derivative                  | 13.18, 13.41, 13.50        |
| Cholesterol, TMS derivative*               | 25.79                | Palmitic acid, TMS derivative                       | 14.24, 15.40, 15.53, 16.11 |
|                                            |                      | 9, 12-octadecadienoic acid, (Z, Z)-, TMS derivative | 16.72                      |
|                                            |                      | Cholesterol, TMS derivative*                        | 25.63                      |

## References

1. Daluz, H. M., *Fundamentals of fingerprint analysis*. Second edition. ed.; CRC Press, Taylor & Francis Group: Boca Raton, FL, 2019.
2. Holder, E. H.; Robinson, L. O.; Laub, J. H., *The fingerprint sourcebook*. US Department. of Justice, Office of Justice Programs, National Institute of ...: 2011.
3. Girod, A.; Ramotowski, R.; Weyermann, C., Composition of fingermark residue: A qualitative and quantitative review. *Forensic Sci. Int.* **2012**, *223* (1), 10–24. <https://doi.org/10.1016/j.forsciint.2012.05.018>
4. Cadd, S.; Islam, M.; Manson, P.; Bleay, S., Fingerprint composition and aging: A literature review. *Sci. Justice* **2015**, *55* (4), 219–238. <https://doi.org/10.1016/j.scijus.2015.02.004>
5. Baker, L. B., Physiology of sweat gland function: The roles of sweating and sweat composition in human health. *Temperature* **2019**, *6* (3), 211–259. [10.1080/23328940.2019.1632145](https://doi.org/10.1080/23328940.2019.1632145)
6. Baker, L. B.; Wolfe, A. S., Physiological mechanisms determining eccrine sweat composition. *European Journal of Applied Physiology* **2020**, *120* (4), 719–752. [10.1007/s00421-020-04323-7](https://doi.org/10.1007/s00421-020-04323-7)
7. Croxton, R. S.; Baron, M. G.; Butler, D.; Kent, T.; Sears, V. G., Variation in amino acid and lipid composition of latent fingerprints. *Forensic Sci. Int.* **2010**, *199* (1), 93–102. <https://doi.org/10.1016/j.forsciint.2010.03.019>
8. de Puit, M.; Ismail, M.; Xu, X., LCMS Analysis of Fingerprints, the Amino Acid Profile of 20 Donors. *J. Forensic Sci.* **2014**, *59* (2), 364–370. [doi:10.1111/1556-4029.12327](https://doi.org/10.1111/1556-4029.12327)
9. Greene, R. S.; Downing, D. T.; Pochi, P. E.; Strauss, J. S., Anatomical Variation in the Amount and Composition of Human Skin Surface Lipid. *J. Invest. Dermatol.* **1970**, *54* (3), 240–247. <https://doi.org/10.1111/1523-1747.ep12280318>

10. Thody, A. J.; Shuster, S., Control and function of sebaceous glands. *Physiol. Rev.* **1989**, *69* (2), 383-416. <https://doi.org/10.1152/physrev.1989.69.2.383>
11. Piérard-Franchimont, C.; Quatresooz, P.; Piérard, G. E., Sebum Production. In *Textbook of Aging Skin*, Farage, M. A.; Miller, K. W.; Maibach, H. I., Eds. Springer Berlin Heidelberg: Berlin, Heidelberg, 2010; pp 343-352.
12. Cadd, S.; Mota, L.; Werkman, D.; Islam, M.; Zuidberg, M.; De Puit, M., Extraction of fatty compounds from fingerprints for GCMS analysis. *Anal. Methods* **2015**, *7* (3), 1123-1132.
13. Girod, A.; Weyermann, C., Lipid composition of fingermark residue and donor classification using GC/MS. *Forensic Sci. Int.* **2014**, *238*, 68-82. <https://doi.org/10.1016/j.forsciint.2014.02.020>
14. Buchanan, M. V.; Asano, K.; Bohanon, A. In *Chemical characterization of fingerprints from adults and children*, Enabling Technologies for Law Enforcement and Security, SPIE: 1997; p 7.
15. Nicolaides, N.; Ray, T., Skin lipids. III. Fatty chains in skin lipids. The use of vernix caseosa to differentiate between endogenous and exogenous components in human skin surface lipid. *J. Am. Oil Chem. Soc.* **1965**, *42* (8), 702-707. 10.1007/bf02540043
16. Frick, A. A.; Chidlow, G.; Lewis, S. W.; van Bronswijk, W., Investigations into the initial composition of latent fingermark lipids by gas chromatography-mass spectrometry. *Forensic Sci. Int.* **2015**, *254*, 133-147. <https://doi.org/10.1016/j.forsciint.2015.06.032>
17. Asano, K.; Bayne, C.; Horsman, K.; Buchanan, M., Chemical Composition of Fingerprints for Gender Determination. *J. Forensic Sci.* **2002**, *47* (4), 1-3.
18. Koenig, A.; Girod, A.; Weyermann, C., Identification of Wax Esters in Latent Print Residues by Gas Chromatography-Mass Spectrometry and Their Potential Use as Aging Parameters. *J. Forensic Ident.* **2011**, *61* (6), 652.
19. Pappas, A.; Fantasia, J.; Chen, T., Age and ethnic variations in sebaceous lipids. *Dermatoendocrinol.* **2013**, *5* (2), 319-324. 10.4161/derm.25366
20. Michalski, S.; Shaler, R.; Dorman, F. L., The Evaluation of Fatty Acid Ratios in Latent Fingermarks by Gas Chromatography/Mass Spectrometry (GC/MS) Analysis. *J. Forensic Sci.* **2013**, *58*, S215-S220. 10.1111/1556-4029.12010
21. Orata, F., Derivatization reactions and reagents for gas chromatography analysis. In *Advanced Gas Chromatography-Progress in Agricultural, Biomedical and Industrial Applications*, InTech: 2012.
22. Blau, K.; King, G. S., *Handbook of derivatives for chromatography*. Reprinted with corrections. ed.; Heyden: London ;, 1978.
23. Knapp, D. R., *Handbook of analytical derivatization reactions*. Wiley: New York, 1979.
24. Klein, D. R., *Organic chemistry*. John Wiley & Sons: 2020.
